# Supplementary material
Source: Elsevier journal article supplement (https://www.sciencedirect.com/science/article/pii/S0213485322000287)
Supplement: mmc1 [file S0213485322000287:mmc1.doc]

**MATERIAL SUPLEMENTARIO**

**ENCUESTA DE MANEJO DE CEFALEAS EN ATENCIÓN PRIMARIA**

El grupo de cefaleas de la sociedad andaluza (SANCE) pretende realizar un análisis de situación del manejo general de las cefaleas en Andalucía. Esta encuesta no es teórica, ni pretendemos realizar un examen sobre conocimientos, sino un reflejo de su práctica clínica habitual. Le pedimos que sea sincero. Muchas gracias

1. Años de experiencia:

 < 5 años

 5-10 años

 >10 años

2. ¿Cuál es tu sexo?

 Masculino

 Femenino

3. ¿Tiene plaza en propiedad?

 SI

 NO

4. ¿Cuál es tu grupo de edad?

 <30

 30-39

 40-49

 50 o más

5. ¿En que provincia se encuentra su Centro de Salud?

 Almería

 Cádiz

 Córdoba

 Granada

 Huelva

 Jaén

 Málaga

 Sevilla

6. ¿En la Consulta, desarrolla una actividad pública o privada?

 Pública

 Privada

 Ambas

7. ¿Qué porcentaje de los pacientes que ve usted en un mes son pacientes con cefalea?

 <10%

 10-20%

 >20-25%

 >25%

8. ¿Cuántos de estos pacientes tienen migraña?

 <25%

 >25-50%

 >50%-75%

 >75%

9. ¿Cuántos de estos pacientes tienen cefalea tensional?

 <25%

 >25-50%

 >50%-75%

 >75%

10. ¿Utiliza tratamientos preventivos en la migraña?

 SI

 NO

11. Haga una lista de los tratamientos preventivos de migraña que utiliza en su práctica clínica diaria

 ----

12. ¿Cuanto tiempo los mantiene?

 1 a 3 meses

 3 meses

 6 meses

13. ¿Maneja a sus pacientes con cefalea o lo manda directamente al neurólogo?

 Trato a los pacientes

 Derivo al neurólogo

14. ¿Existe protocolo de derivación al Servicio de Neurología?

 SI

 NO

15. ¿Cuál es el motivo de derivación cuando la realiza?

 Confirmar diagnóstico

 Falta de eficacia del tratamiento sintomático

 Falta de eficacia del tratamiento preventivo

 Cambio en el patrón de cefaleas

 Otros (especifique cuál)

16. ¿Cuántos preventivos utiliza antes de mandarlo?

 Ninguno

 Uno

 Dos

 Tres o más

17. ¿Conoce la posibilidad de usar otros tratamientos preventivos para la migraña, además de los fármacos orales?. Enumérelos

 ---

18. ¿Utiliza tratamientos sintomático en las crisis?

 SI

 NO

19. Si es afirmativo, enumere los que utilice con nombre propio, no por categoría de fármaco.

 ---

20. ¿Suele prescribir el tratamiento sintomático pautado a diario?

 SI

 NO

21. ¿Sabe que el abuso de medicación empeora las migrañas?

 SI

 NO

22. ¿Sabe manejar una cefalea por abuso de medicación?

 SI

 NO

23. ¿Cómo los trata?

 ---

24. ¿Sabría diagnosticar una cefalea en racimos?

 SI

 NO

25. ¿Cómo la trata?

a. Analgésicos

b. AINEs

c. Opiodes

d. Neuromoduladores

26. ¿Sabría diagnosticar una neuralgia del trigémino?

 SI

 NO

27. ¿Cómo la trata?

 Analgésicos

 AINEs

 Opioides

 Neuromoduladores (Carbamacepina, Oxcarbacepina, Gabapentina, Pregabalina)

 Antidepresivos tricíclicos

 Baclofeno

28. ¿Solicita estudios de neuroimagen (TAC,RM)

 SI

 NO

29. ¿Cree necesario que existan Unidades/Consulta de Cefaleas?

 SI

 NO

30. ¿Le gustaría que desde el grupo de cefaleas de la SAN comenzásemos a impartir cursos formativos acreditados sobre el manejo de cefaleas en Atención Primaria?

 SI

 NO

**ENCUESTA SOBRE MANEJO DE CEFALEAS EN URGENCIAS**

El grupo de cefaleas de la sociedad andaluza (SANCE) pretende realizar un análisis de situación del manejo general de las cefaleas en los distintos niveles asistenciales de Andalucía. Esta encuesta no es teórica, ni pretendemos realizar un examen sobre conocimientos, sino un reflejo de su práctica clínica habitual. Le pedimos que sea sincero. Muchas gracias

1. Situación profesional

 Médico de Urgencias

 Residente

2. Años de experiencia:

 < 5 años

 5-10 años

 >10 años

3. ¿Cuál es tu sexo?

 Masculino

 Femenino

4. ¿Cuál es tu grupo de edad?

 <30 años

 30-39 años

 40-49 años

 >50 años

5. ¿En que provincia se encuentra su Centro de Salud?

 Almería

 Cádiz

 Córdoba

 Granada

 Huelva

 Jaén

 Málaga

 Sevilla

6. ¿En el Servicio de Urgencias, desarrolla una actividad pública o privada?

 Pública

 Privada

 Ambas

7. ¿Qué porcentaje de los pacientes que ve usted en un mes en urgencias son pacientes con cefaleas?

 <10%

 10-20%

 >20-25%

 >25%

8. ¿Cuántos de estos son pacientes piensas que tienen migraña?

 <25%

 >25-50%

 >50%-75%

 >75%

9. ¿Cuántos de estos pacientes piensas que tienen cefalea tensional?

 <25%

 >25-50%

 >50%-75%

 >75%

10. ¿Qué fármacos utiliza para tratar una crisis de migraña en urgencias? Señale los escalones terapéuticos que utiliza

 Analgésicos

 AINEs

 Opioides

 Triptanes

11. ¿Prescribe tratamiento sintomático en el informe de alta de urgencias?

 SI

 NO

12. ¿Cuál?

 Analgésicos

 AINEs

 Opioides

 Triptanes

13. ¿Sabe que las crisis de migraña pueden tratarse con bloqueos anestésicos?

 SI

 NO

14. ¿Estaría interesado en aprender a hacerlos y poder usarlo en su práctica clínica habitual?

 SI

 NO

15. ¿Prescribe tratamientos preventivos en la migraña, al alta?

 SI

 NO

16. Haga una lista de los tratamientos preventivos de migraña que utiliza en su práctica clínica diaria

17. ¿Deriva siempre al paciente con migraña?

 SI

 NO

18. ¿A quién lo deriva?

 AP

 Neurología

 Otros (Especifique cuál)....

19. ¿Conoce la posibilidad de usar otros tratamientos preventivos para la migraña, además de los fármacos orales?

 SI

 NO

20. Enumérelos

21. ¿Sabría diagnosticar una cefalea en racimos?

 SI

 NO

22. ¿Cómo trata una crisis de cefalea en racimos en urgencias?

 Analgésicos

 AINEs

 Opioides

 Sumatriptán s.c

 Oxígeno

 Bloqueo de nervio occipital

23. ¿Prescribe tratamiento preventivo para una cefalea en racimos en el informe de alta?.

 SI

 NO

24. ¿Sabría diagnosticar una neuralgia del trigémino?

 SI

 NO

25. ¿Cómo la trataría?

 Analgésicos

 AINEs

 Opioides

 Neuromoduladores (Carbamacepina, Oxcarbacepina, Gabapentina, Pregagalina)

 Antidepresivos tricíclicos

 Baclofeno

26. ¿Tienen en su hospital buen comunicación con Neurología?.

 SI

 NO

27. ¿Existen protocolos entre Neurología y Urgencias para el manejo de cefaleas?

 SI

 NO

28. ¿Cree necesario que existan unidades de cefaleas?

 SI

 NO

29. ¿Existe Unidad/Consulta de Cefaleas en su centro de trabajo?

 SI

 NO

30. ¿Le gustaría que desde el grupo de cefaleas de la SAN, SEMES, SEMFYC comenzásemos a impartir cursos formativos acreditados sobre el manejo de cefaleas en Urgencias?

 SI

 NO

**ENCUESTA DE MANEJO DE CEFALEAS EN NEUROLOGÍA**

Estimados compañeros:

Queremos realizar un análisis de la situación y manejo general de las cefaleas en Andalucía y que abarque a todos los profesionales implicados. Esta encuesta no es teórica, ni pretendemos realizar un examen sobre conocimientos, sino un reflejo de su práctica clínica habitual. Le pedimos que sea sincero. Muchas gracias.

1 ¿Cuál es tu sexo?

 Masculino

 Femenino

2 ¿Cuál es tu grupo de edad?

 <30

 30-39

 40-49

 50 o más

3 ¿En que provincia se encuentra el Servicio de Neurología?

 Almería

 Cádiz

 Córdoba

 Granada

 Huelva

 Jaén

 Málaga

 Sevilla

4 ¿Desarrolla su actividad a nivel público o privado?

 Pública

 Privada

 Ambas

5 ¿ En qué tipo de centro se halla el Servicio de Neurología?

 Hospital Básico

 Hospital Universitario

 Consulta privada

 Hospital privado

 Otro (Especifique)

6 ¿Cuál es la vía habitual de acceso de los pacientes con cefaleas?

 AP

 Urgencias

 Otras Especialidades

 Libre

 Otro (Especifique)

7 ¿Se revisan las derivaciones?

 Si

 No

8 ¿Existe lista de espera diferenciada ordinarias, y preferentes?

 Si

 No

9 ¿Cuál es la demora aproximada de la 1ª visita ordinaria?

 < 1 mes

 1-3 meses

 4-6 meses

 > 6 meses

10 ¿Cuál es la demora aproximada de las visitas preferentes?

 < 15 días

 15-30 días

 1-3 meses

 > 3 meses

11 ¿Cuanto es el tiempo asignado para una primera visita?

 < 15 minutos

 15-19 minutos

 20-29 minutos

 30-39 minutos

 40 o más

12 ¿Cuál considera que es el tiempo deseable para una primera visita?

 < 15 minutos

 15-19 minutos

 20-29 minutos

 30-39 minutos

 40 o más

13 ¿Cuál es el tiempo asignado para una segunda visita?

 < 10 minutos

 10-19 minutos

 20-29 minutos

 30 o más

14 ¿Cuál considera que es el tiempo deseable para una segunda visita?

 < 10 minutos

 10-19 minutos

 20-29 minutos

 30 o más

15 ¿Existe un acceso rápido/diferenciado para determinadas patologías? (Señale todas en la que existe)

 Cefalea en Racimos

 Neuralgia del Trigémino

 Embarazo

 Otros (especifique cuál)

16 ¿Que porcentaje de los pacientes que ve usted en un mes, son pacientes con cefaleas?

 Indique el porcentaje

17 ¿Cuantos de estos pacientes tienen migraña?

 Indique porcentaje

18 ¿Cuántos de estos pacientes tienen cefalea tensional?

 Indique número porcentaje

19 ¿Cuantos de estos pacientes tienen cefaleas trigémino-autonómicas?

 Indique número porcentaje

20 ¿Cuantos de estos pacientes tienen neuralgias craneales?

 Indique número porcentaje

21 Existen protocolos/criterios derivación consensuados con AP?

 Si

 No

22 ¿Existen protocolos/criterios derivación consensuados con Urgencias?

 Si

 No

23 ¿Existen protocolos/criterios derivación consensuados con Especialidades?

 Si

 No

24 En su Servicio de Neurología, ¿existe Unidad/Consulta de Cefaleas?

 Si

 No

25 ¿Existen criterios de derivación para derivar a la Consulta/Unidad de Cefaleas?

 Si

 No

26 ¿Trata a sus pacientes con cefalea o los deriva directamente a la Unidad/Consulta de cefaleas?

 Los trato

 Los derivo

27 ¿Utiliza tratamientos preventivos? ¿Cuales?

 No

 Si, ¿Cuales?

28 ¿Utiliza tratamientos distintos a la vía oral?

 No

 Si, ¿cuales?

29 ¿Conoce los nuevos tratamientos en migraña?

 Si

 No

30 ¿Sabría indicar algunos de los nuevos tratamientos en migraña?

 ---

31 ¿Existen protocolos de atención de las cefaleas en Urgencias?

 Si

 No

32 ¿Se clasifican los diagnósticos según la Clasificación Internacional de las Cefaleas actualizada?

 Si

 No

33 ¿Se utilizan calendarios/diarios de cefaleas?

 Si

 No

34 ¿Se utilizan escalas de impacto/discapacidad de la cefalea?

 Si

 No

35 ¿Se utilizan escalas de calidad de vida?

 Si

 No

36 ¿Los pacientes reciben la información que precisan para comprender la cefalea y su manejo?

 Si

 No

37 ¿Se les indica a los pacientes donde pueden acceder a información fiable sobre su patología?

 Si

 No

38 ¿Existe protocolo de tratamiento hospitalario de la cefalea por abuso de medicación?

 Si

 No

39 ¿ Cree necesario que existan Unidades/Consultas de Cefaleas?

 Si

 No

40 ¿Le gustaría que desde el grupo de cefaleas de la SAN se comenzará a impartir cursos formativos acreditados sobre el manejo de las cefaleas?

 Si

 No

**ENCUESTA DE MANEJO DE CEFALEAS EN UNIDADES/CONSULTAS DE CEFALEA**

El grupo de cefaleas de la Sociedad Andaluza de Neurología (SANCE) pretende realizar un análisis de situación del manejo general de las cefaleas en Andalucía. Esta encuesta no es teórica, ni pretendemos realizar un examen sobre conocimientos, sino un reflejo de su práctica clínica habitual. Le pedimos que sea sincero. Muchas gracias.

1 ¿Cuál es tu sexo?

 Masculino

 Femenino



2 ¿Cuál es tu grupo de edad?

 <30

 30-39

 40-49

 50 o más



3 ¿En que provincia se encuentra la Consulta o Unidad de Cefaleas?

 Almería

 Cádiz

 Córdoba

 Granada

 Huelva

 Jaén

 Málaga

 Sevilla



4 ¿En la Consulta o Unidad de Cefaleas, desarrolla una actividad pública o privada?

 Pública

 Privada

 Ambas



5 ¿ En qué tipo de centro se halla la Consulta o Unidad?

 Hospital Básico

 Hospital Universitario

 Consulta privada

 Hospital privado

 Otro (Especifique)

6 ¿Con qué número de neurólogos a tiempo completo cuenta?

 1

 2

 3 o más



7 ¿Con qué número de neurólogos a tiempo parcial?

 1

 2

 3 o más

8 ¿Con qué número de personal de enfermería a tiempo completo?

 Ninguno

 1

 2 o más

9 ¿Con qué número de personal de enfermería a tiempo parcial?

 Ninguno

 1

 2 o más

10 ¿Cuenta con acceso a Psiquiatría?

 Si

 No

11 ¿Cuenta con acceso a Neurorradiología?

 Si

 No

12 ¿Cuenta con acceso a Neurocirugía?

 Si

 No

13 ¿Cuenta con acceso a Oftalmología?

 Si

 No

14 ¿Cuenta con acceso a Neurofisiología?

 Si

 No

15 ¿Cuenta con acceso a Psicología/Terapias psicológicas?

 Si

 No

16 ¿Qué número de sesiones de consulta por semana desarrolla la Unidad o Consulta de Cefalea?

 1

 2

 3

 4 o más

17 ¿De qué número de despacho dispone?

 1

 2

 3 o más

18 ¿Dispone de Consulta de Enfermería?

 Si

 No

19 ¿Desarrolla actividad en Hospital de Día?

 Si

 No

20 ¿Cuál es la vía habitual de acceso a la Consulta o Unidad?

 AP

 Neurología

 Otras Especialidades

 Libre

 Otro (especifique cuál)

21 ¿Se revisan las derivaciones?

 Si

 No

22 ¿Existe acceso directo desde AP?

 Si

 No

23 ¿Existe acceso directo desde Urgencias?

 Si

 No

24 ¿Existe acceso directo desde otras especialidades?

 Si

 No

25 ¿Existe lista de espera diferenciada ordinarias, y preferentes?

 Si

 No

26 ¿Cuál es la demora aproximada de la 1ª visita ordinaria?

 < 1 mes

 1-3 meses

 4-6 meses

 > 6 meses

27 ¿Cuál es la demora aproximada de las 1ª visitas preferentes?

 < 15 días

 15-30 días

 1-3 meses

 > 3 meses

28 ¿Cuanto es el tiempo asignado para una primera visita de cefaleas?

 < 15 minutos

 15-19 minutos

 20-29 minutos

 30-39 minutos

 40 o más

29 ¿Cuál considera que es el tiempo deseable para una primera visita de cefaleas?

 < 15 minutos

 15-19 minutos

 20-29 minutos

 30-39 minutos

 40 o más

30 ¿Cuál es el tiempo asignado para una segunda visita de cefaleas?

 < 10 minutos

 10-19 minutos

 20-29 minutos

 30 o más

31 ¿Cuál considera que es el tiempo deseable para una segunda visita de cefaleas?

 < 10 minutos

 10-19 minutos

 20-29 minutos

 30 o más

32 ¿Existe un acceso rápido/diferenciado para determinadas patologías? (Señale todas en la que existe)

 Cefalea en Racimos

 Neuralgia del Trigémino

 Embarazo

 Otros (especifique cuál)



33 ¿Existen protocolos/criterios derivación consensuados para derivar pacientes a la Consulta/Unidad?

 Si

 No

34 ¿Se permite el seguimiento de los pacientes cuando es apropiado?

 Si

 No

35 ¿Se interroga el perfil temporal de la cefalea?

 Si

 No

36 ¿Se registra la duración de la cefalea que motiva la consulta?

 Si

 No

37 ¿Se registra la frecuencia, duración e intensidad de la cefalea?

 Si

 No

38 ¿Los pacientes reciben un diagnóstico de trabajo en la primera visita?

 Si

 No

39 ¿Se establece un diagnóstico definitivo en las primera visita o en las subsiguientes o en su defecto se les cita para control?

 Se establece un diagnóstico definitivo en las primera visita o en las subsiguientes

 Se les cita para control

40 ¿Se revisa el diagnóstico en las visitas de seguimiento?

 Si

 No

41 ¿Se registra el diagnóstico?

 Si

 No

42 ¿Se clasifican los diagnósticos según la Clasificación Internacional de las Cefaleas actualizada?

 Si

 No

43 ¿Se utilizan calendarios/diarios de cefaleas?

 Si

 No

44 ¿Se utilizan escalas de impacto/discapacidad de la cefalea?

 Si, ¿cuales?

 No

45 ¿Se utilizan escalas de calidad de vida?

 Si, ¿cuales?

 No

46 ¿Los pacientes reciben la información que precisan para comprender la cefalea y su manejo?

 Si

 No

47 ¿Se les indica a los pacientes donde pueden acceder a información fiable sobre su patología?

 Si

 No

48 ¿Se da información de páginas web de cefaleas?

 Si

 No

49 ¿Existen folletos informativos en la Unidad/Consulta de Cefalea?

 Si

 No

50 ¿Se realizan bloqueos anestésicos de nervios craneales o faciales?

 Si

 No

51 ¿Se realizan bloqueos de puntos sensibles y gatillo y/o punción seca miofascial?

 Si

 No

52 ¿Se realizan infiltraciones con toxina botulínica en Migraña Crónica?

 Si

 No

53 ¿Se realizan infiltraciones con toxina botulínica en otras indicaciones distintas a la Migraña Crónica?

 Si

 No

54 ¿Se implantan neuroestimuladores?

 Si

 No

55 ¿Existe protocolo de tratamiento hospitalario de la cefalea por abuso de medicación?

 Si

 No

56 ¿Qué número aproximado de primeras visitas/año realiza la Unidad o Consulta de Cefaleas?

 <100

 100-299

 300-499

 >500

57 ¿Qué número aproximado de visitas totales/año realiza la Unidad o Consulta de Cefaleas?

 <300

 300-499

 500-999

 1.000-1.499

 >1.500

58 Se realiza actividad docente?

 Si

 No

59 Se realiza actividad científica o investigadora?

 Si

 No

60 ¿Pertenece a alguna sociedad científica relacionada con las cefaleas? Señale todas a las que pertenezca.

 SANCE

 GECSEN

 IHS

 Otra (especifique)

61 ¿Se registran las complicaciones de los tratamientos o procedimientos diagnósticos o terapéuticos practicados?

 Si

 No

62 ¿Se evalúa y conoce la satisfacción del usuario?

 Si

 No

63 Se evalúa y conoce el número de reclamaciones y el tratamiento de las mismas?

 Si

 No

64 ¿Se evalúa y conoce la satisfacción del personal de la Unidad/Consulta?

 Si

 No

65 ¿Se miden los costes de la Consulta/unidad como parte de una política coste-eficacia?

 Si

 No

66 ¿Se mide la actividad de la Consulta/Unidad?

 Si

 No

67 ¿Se realiza un informe o memoria con un análisis global de resultados de la Consulta/Unidad?

 Si

 No

68 ¿Se evalúan los resultados midiendo la respuesta en relación con los síntomas de los pacientes (frecuencia, duración e intensidad de la cefalea?

 Si

 No

69 ¿Se miden los resultados utilizando escalas de impacto o discapacidad de la cefalea?

 Si

 No

70 ¿Se miden los resultados utilizando escalas de calidad de vida?

 Si

 No
